# Supplementary material for: Impact of lignans in oilseed mix on gut microbiome composition and enterolignan production in younger healthy and premenopausal women: an in vitro pilot study
Source: PubMed Central journal article supplement (PMC7119089; doi:10.1186/s12934-020-01341-0), 2020-04-03

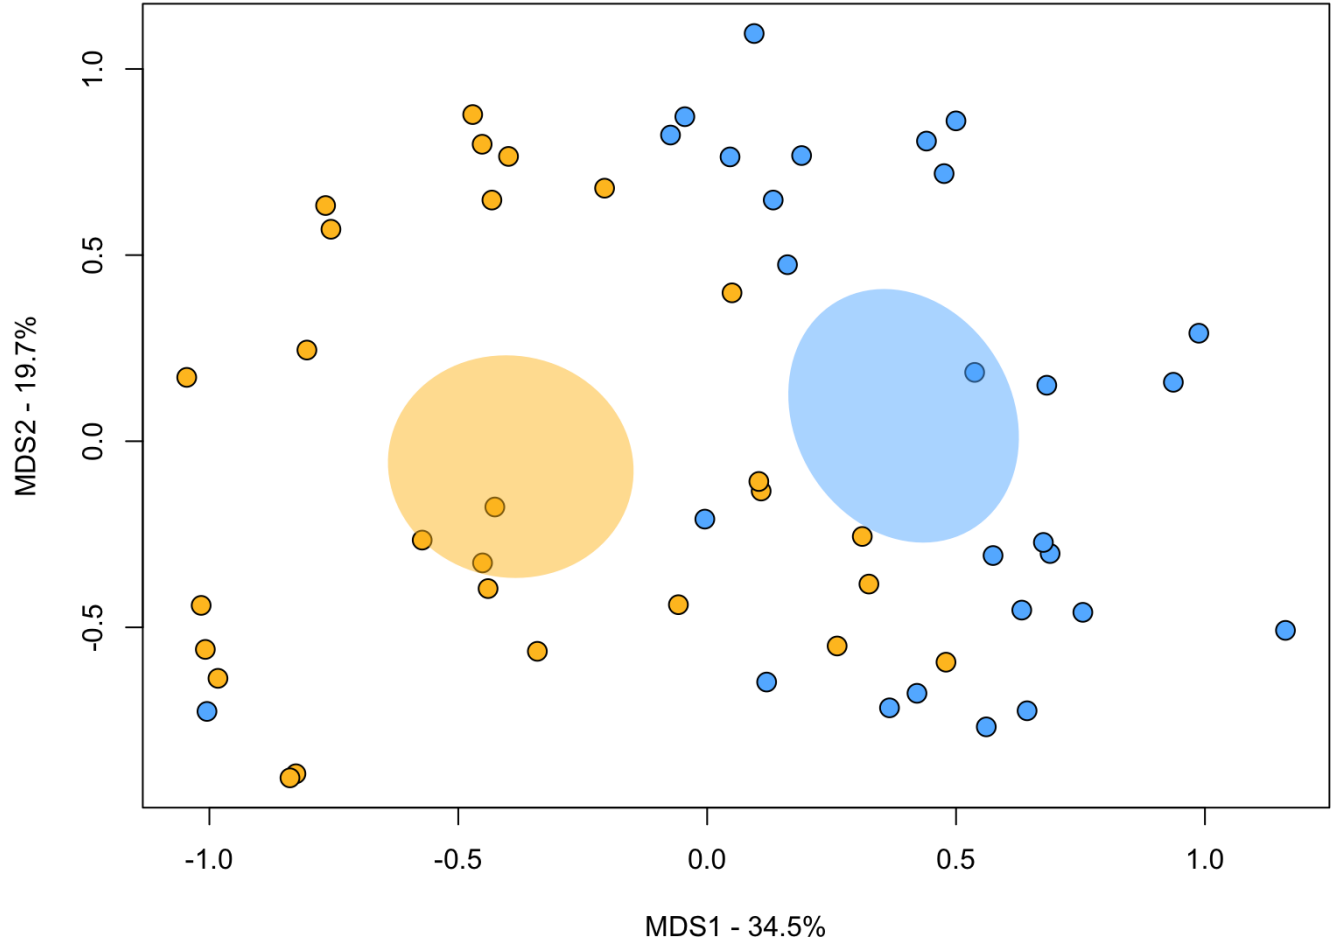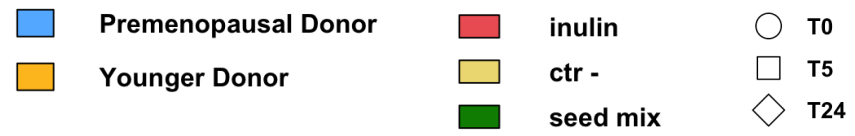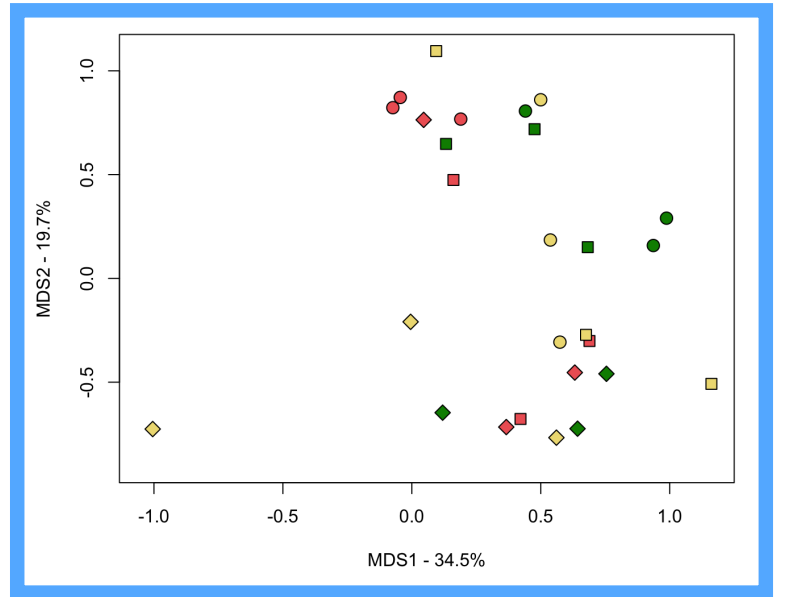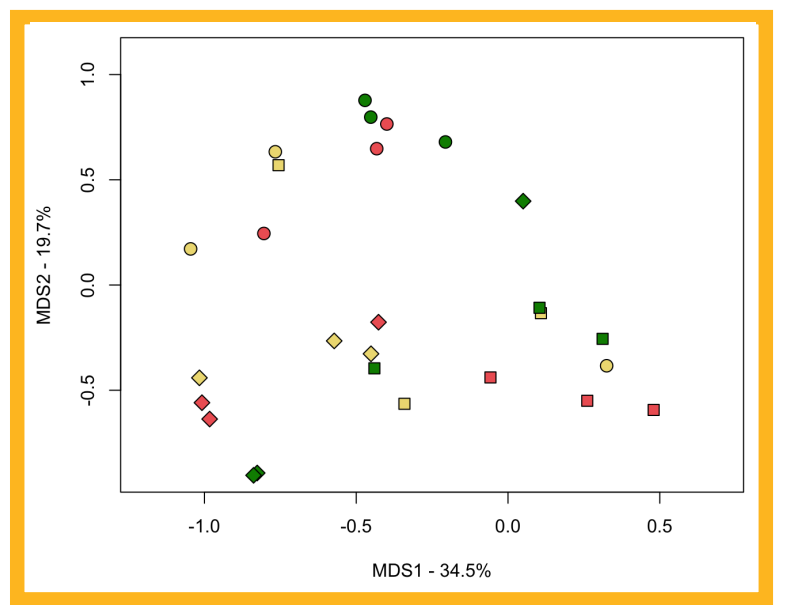

Supplement: 12934_2020_1341_MOESM2_ESM.pdf [file 12934_2020_1341_MOESM2_ESM.pdf]
