# Supplementary material for: Impact of lignans in oilseed mix on gut microbiome composition and enterolignan production in younger healthy and premenopausal women: an in vitro pilot study
Source: Microb Cell Fact. 2020 Apr 3;19:82. doi: 10.1186/s12934-020-01341-0 (PMC7119089; doi:10.1186/s12934-020-01341-0)
Supplement: Supplementary file 3 — Additional file 3: Table S1. Results of adonis and ANOSIM statistics applied to weighted and unweighted UniFrac distance-based ordination (related to Fig. 4 and Additional file 2: Fig. S2). PD: premenopausal donor; YD: younger donor. [file 12934_2020_1341_MOESM3_ESM.xlsx]

## Sheet: Foglio1
Table S1. Results of adonis and ANOSIM statistics applied to weighted and unweighted UniFrac distance-based ordination (related to Figure 4 and S2). PD: premenopausal donor; YD: younger donor.
			anosim		adonis
			R	p value	R2	p value
weighted UniFrac	YD	T0vsT5	-0.009602	0.491	0.01832	0.4285
		T5vsT24	0.06104	0.133	0.02554	0.2174
		T0vsT24	0.2425	0.0038	0.05433	0.0116
	PD	T0vsT5	0.4345	0.0041	0.05729	0.0073
		T5vsT24	0.4757	0.001	0.05597	0.011
		T0vsT24	0.4688	0.0013	0.0612	0.0053
unweighted UniFrac	YD	T0vsT5	-0.05624	0.7895	0.01433	0.8627
		T5vsT24	0.2661	0.0079	0.04668	0.0003
		T0vsT24	0.3872	0.0002	0.03831	0.0031
	PD	T0vsT5	0.1052	0.1135	0.02106	0.2565
		T5vsT24	0.3004	0.0049	0.04437	0.0007
		T0vsT24	0.489	0.0007	0.03219	0.0142
